# Supplementary material
Source: Springer Nature journal article supplement (https://www.springermedizin.de/resource/supplementary/12889_2009_2312_MOESM4_ESM.pdf/9485352)
Supplement: MOESM4 [file 9485352]

932 abstracts identified through the search

890 abstracts were excluded

42 full papers were reviewed

14 papers included in the analysis

- 3 experimental studies on HIV vaccine, workplace-based education for male conscripts, and provider-initiated voluntary HIV screening;
- 6 quasi-experimental studies on workplace-based education for female sex workers, school-based education for young people, and community-based education for injecting drug users;
- 3 economic evaluation studies on the prevention of vertical HIV transmission, HIV vaccine, and screening blood products;
- 2 observational studies of a '100% condom' program and prevention of vertical HIV transmission

28 papers excluded after reviewing their full texts
